# Supplementary material for: Mutual Information-Driven Feature Reduction for Hyperspectral Image Classification
Source: MDPI journal article supplement (doi:10.3390/s23020657), 2023-01-06
Supplement: s1 [file s1]

# Mutual Information-Driven Feature Reduction for Hyperspectral Image Classification

Md Rashedul Islam <sup>1</sup>, Boshir Ahmed <sup>2</sup>, Md Ali Hossain <sup>2</sup> and Md Palash Uddin <sup>1,3,\*</sup>

<sup>1</sup> Department of Computer Science and Engineering, Hajee Mohammad Danesh Science and Technology University, Dinajpur 5200, Bangladesh

<sup>2</sup> Department of Computer Science and Engineering, Rajshahi University of Engineering & Technology, Rajshahi 6204, Bangladesh

<sup>3</sup> School of Information Technology, Deakin University, Geelong, VIC 3220, Australia

\* Correspondence: m.uddin@deakin.edu.au or palash\_cse@hstu.ac.bd

## List of supporting materials

**Figure S1:** Structure of an HSI.

**Figure S2:** HSI datasets

**Table S1:** Acronyms of different studied and proposed methods.

**Table S2:** The rank of selected features for the classification of Indian Pines dataset.

**Table S3:** The rank of selected features for the classification of DC Mall dataset

**Table S4:** Training and testing samples for AVIRIS dataset.

**Table S5:** Training and testing samples for HYDICE dataset.

**Table S6:** Error matrix of BgPCA-NMI for Indian Pines dataset.

**Table S7:** Error matrix of BgPCA-NMI for DC Mall dataset.

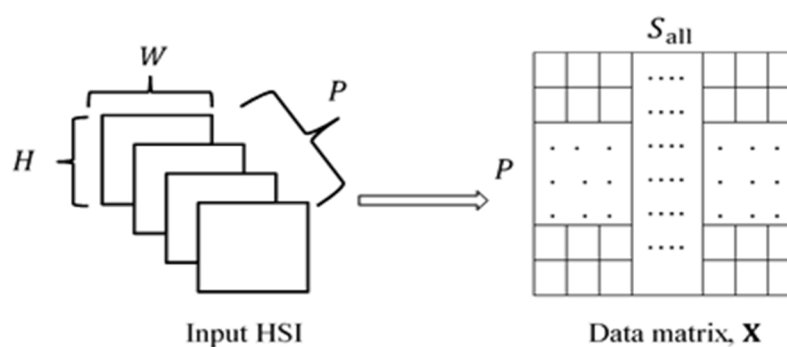

**Figure S1.** Transformation of an HSI (left) into a data matrix,  $\mathbf{X}$  of size  $P \times S_{\text{all}}$  (right), where  $S_{\text{all}} = H * W$ , indicating total pixels or spectral signatures in the HSI.

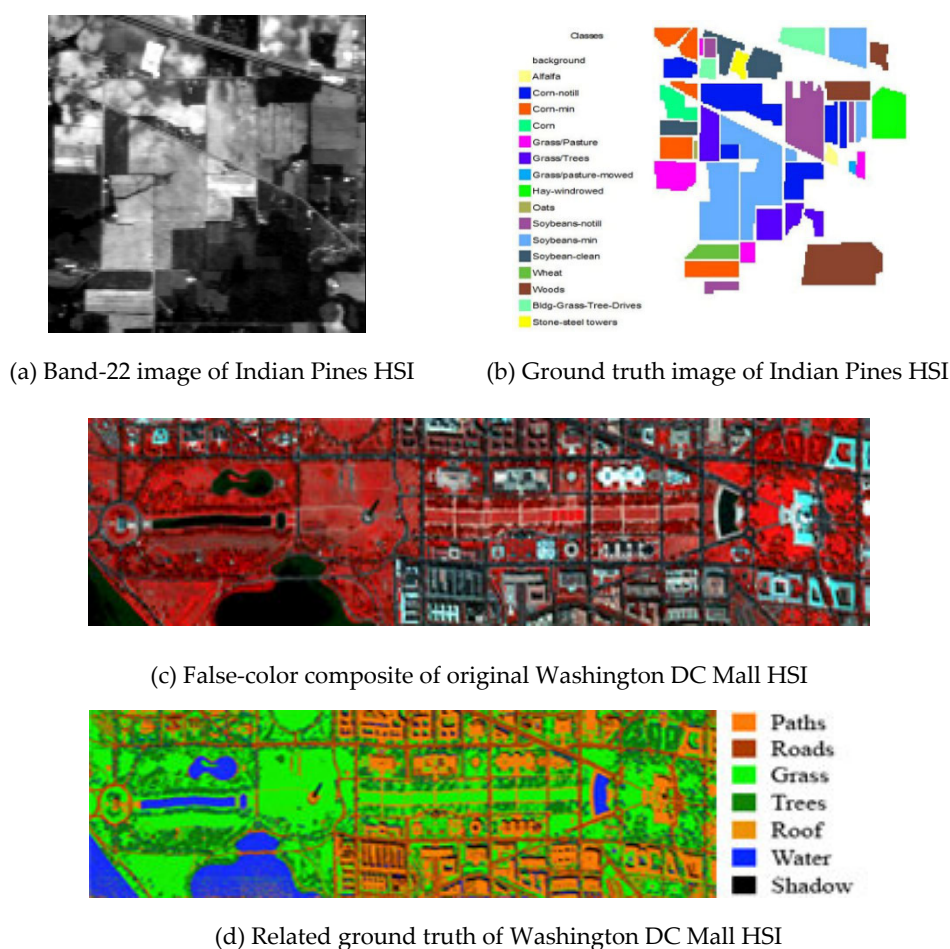

**Figure S2.** HSI datasets: (a) band-22 image of Indian Pines HSI, which is captured at 0.6 m wavelengths, (b) ground truth image of Indian Pines dataset, (c) false-color composite of original Washington DC Mall HSI, and (d) ground truth of Washington DC Mall dataset.

**Table S1.** Acronyms of different studied and proposed methods.

| Acronym   | Method                                                                  |
|-----------|-------------------------------------------------------------------------|
| PCA       | The conventional PCA                                                    |
| SPCA      | Correlation-based band segmentation with variance-based feature ranking |
| SPCA-NMI  | Correlation-based band segmentation with NMI-based mRMR FS              |
| BgPCA     | NMI-based band grouping with variance-based feature ranking             |
| BgPCA-NMI | NMI-based band grouping with NMI-based mRMR FS                          |

**Table S2.** The rank of selected features for the classification of Indian Pines dataset.

| Method | Order of Selected Features                                                                                                                                                                                                                                     |
|--------|----------------------------------------------------------------------------------------------------------------------------------------------------------------------------------------------------------------------------------------------------------------|
| PCA    | PC 1 to PC 15                                                                                                                                                                                                                                                  |
| SPCA   | Segment 1: PC 1; Segment 1: PC 2; Segment 3: PC 1; Segment 2: PC 2; Segment 2: PC 3; Segment 2: PC 1; Segment 1: PC 3; Segment 1: PC 4; Segment 2: PC 3; Segment 3: PC 2; Segment 1: PC 5; Segment 1: PC 6; Segment 1: PC 7; Segment 2: PC 8; Segment 2: PC 5; |

|           |                                                                                                                                                                                                                                                                      |
|-----------|----------------------------------------------------------------------------------------------------------------------------------------------------------------------------------------------------------------------------------------------------------------------|
| SPCA-NMI  | Segment 1: PC 1; Segment 1: PC 10; Segment 1: PC 9; Segment 1: PC 3; Segment 1: PC 19; Segment 2: PC 34; Segment 1: PC 2; Segment 1: PC 5; Segment 1: PC 6; Segment 3: PC 17; Segment 1: PC 12; Segment 1: PC 7; Segment 1: PC 15; Segment 3: PC 2; Segment 2: PC 5; |
| BgPCA     | Group 1: PC 1; Group 1: PC 2; Group 2: PC 2; Group 1: PC 3; Group 3: PC 2; Group 1: PC 4; Group 1: PC 5; Group 1: PC 6; Group 1: PC 7; Group 1: PC 8; Group 1: PC 9; Group 1: PC 10; Group 1: PC 11; Group 2: PC 3; Group 1: PC 12;                                  |
| BgPCA-NMI | Group 1: PC 1; Group 2: PC 4; Group 2: PC 2; Group 2: PC 3; Group 3: PC 2; Group 1: PC 3; Group 1: PC 4; Group 3: PC 3; Group 1: PC 5; Group 1: PC 6; Group 1: PC 2; Group 3: PC 4; Group 2: PC 5; Group 1: PC 10; Group 3: PC 5;                                    |

**Table S3.** The rank of selected features for the classification of DC Mall dataset.

| Method    | Order of Selected Features                                                                                                              |
|-----------|-----------------------------------------------------------------------------------------------------------------------------------------|
| PCA       | PC 1 to PC 8                                                                                                                            |
| SPCA      | Segment 2: PC 1; Segment 1: PC 1; Segment 3: PC 1; Segment 1: PC 2; Segment 2: PC 2; Segment 2: PC 3; Segment 1: PC 3; Segment 1: PC 4; |
| SPCA-NMI  | Segment 2: PC 1; Segment 3: PC 3; Segment 1: PC 3; Segment 1: PC 2; Segment 3: PC 1; Segment 3: PC 2; Segment 3: PC 4; Segment 1: PC 1; |
| BgPCA     | Group 1: PC 2; Group 4: PC 1; Group 4: PC 2; Group 2: PC 5; Group 2: PC 1; Group 3: PC 3; Group 1: PC 1; Group 3: PC 2;                 |
| BgPCA-NMI | Group 2: PC 1; Group 1: PC 1; Group 1: PC 2; Group 3: PC 1; Group 2: PC 2; Group 1: PC 3; Group 1: PC 4; Group 2: PC 2;                 |

**Table S4.** Training and testing samples for AVIRIS dataset.

| Class                              | Training Samples | Testing Samples |
|------------------------------------|------------------|-----------------|
| Hay-windrowed (C1)                 | 165              | 135             |
| Soybean-notill (C2)                | 109              | 85              |
| Woods (C3)                         | 279              | 248             |
| Wheat (C4)                         | 42               | 63              |
| Grass-trees (C5)                   | 96               | 80              |
| Soybean-mintill (C6)               | 130              | 165             |
| Grass-pasture (C7)                 | 108              | 72              |
| Corn-notill (C8)                   | 48               | 40              |
| Corn (C9)                          | 48               | 44              |
| Corn-mintill (C10)                 | 15               | 14              |
| Stone-Steel-Towers (C11)           | 25               | 20              |
| Alfalfa (C12)                      | 15               | 15              |
| Soybean-clean (C13)                | 21               | 10              |
| Buildings-Grass-Trees-Drives (C14) | 20               | 15              |
| Total Samples                      | 1137             | 1006            |

**Table S5.** Training and testing samples for HYDICE dataset.

| Class         | Training Samples | Testing Samples |
|---------------|------------------|-----------------|
| Shadow (C1)   | 20               | 16              |
| Tree (C2)     | 367              | 1056            |
| Roof (C3)     | 117              | 108             |
| Water (C4)    | 425              | 476             |
| Street (C5)   | 299              | 369             |
| Grass (C6)    | 361              | 850             |
| Total samples | 1589             | 2875            |

**Table S6.** Error matrix of BgPCA-NMI for Indian Pines dataset.

[illegible]

**Table S7.** Error matrix of BgPCA-NMI for Washington DC Mall dataset.

|                |    | Predicted Class |      |     |     |     |     |
|----------------|----|-----------------|------|-----|-----|-----|-----|
|                |    | C1              | C2   | C3  | C4  | C5  | C6  |
| Original Class | C1 | 16              | 0    | 0   | 2   | 0   | 0   |
|                | C2 | 0               | 1032 | 0   | 0   | 0   | 2   |
|                | C3 | 0               | 0    | 108 | 0   | 0   | 0   |
|                | C4 | 0               | 0    | 0   | 474 | 0   | 0   |
|                | C5 | 0               | 9    | 0   | 0   | 369 | 0   |
|                | C6 | 0               | 15   | 0   | 0   | 0   | 848 |
